# Supplementary material
Source: PubMed Central journal article supplement (PMC4293454)
Supplement: NIHMS55992-supplement-5.pdf [file NIHMS55992-supplement-5.pdf]

A) Segregation error types

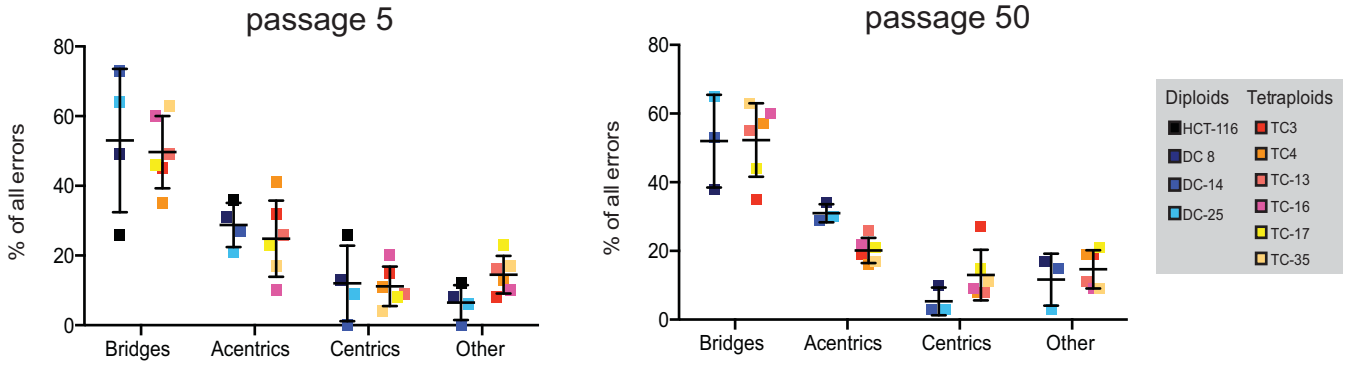

B)

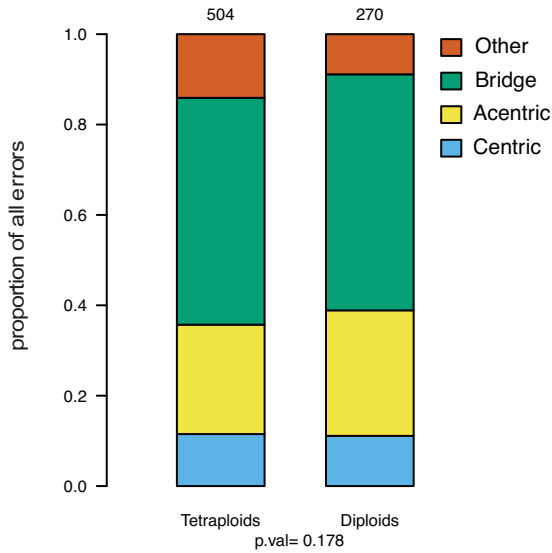

C)

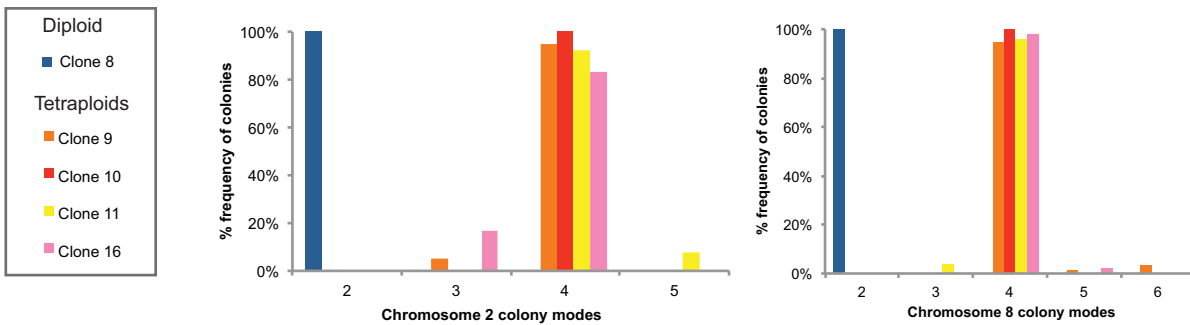

**Supplementary Figure 3**

**A)** Types of segregation errors observed in diploid and tetraploid cells. Only cells with errors were included in this analysis, and the percentage frequency of each type of error was calculated. Median number of errors scored for passage 5 =39, passage 50=37. Images were analysed with Softworx Explorer (Applied Precision, LLP) software. Segregation errors were classified as described (23).

**B)** Analysis of types of errors between diploids and tetraploids reveals no significant difference in prevalence of different types of segregation errors ( $P=0.178$ , Chi-squared test). Number of errors is shown on top of bars.

**C)** Clonal FISH shows colony-to-colony variation in modal chromosome number. Frequency of colonies with the indicated modal chromosome number for chromosome 2 and chromosome 8 is shown for the indicated diploid and tetraploid clones of HCT-116\_MLH1.
