# Supplementary material
Source: PubMed Central journal article supplement (PMC4293454)
Supplement: NIHMS55992-supplement-6.pdf [file NIHMS55992-supplement-6.pdf]

A) Supplementary movie A: Error followed by mitosis

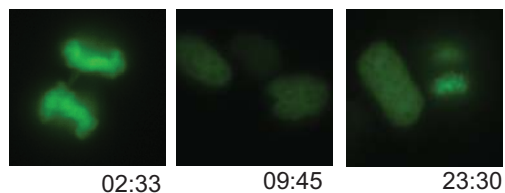

B) Supplementary movie B: Error followed by arrest

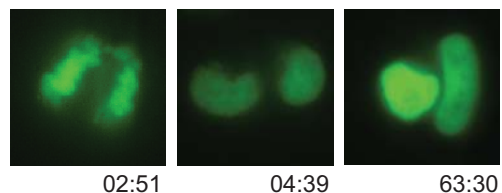

C) Supplementary movie C: Error followed by cell death

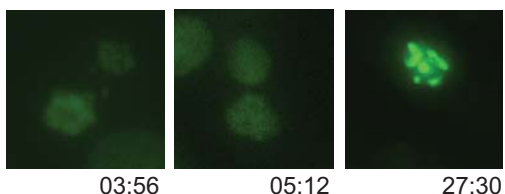

D) Supplementary movie D: No error followed by mitosis

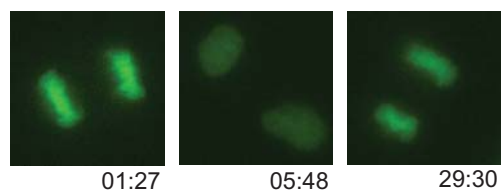

E) Supplementary movie E: No error followed by arrest

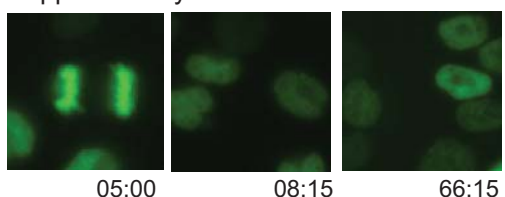

F) Supplementary movie F: No error followed by cell death

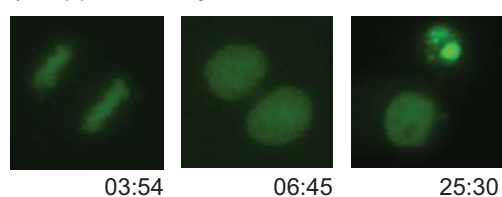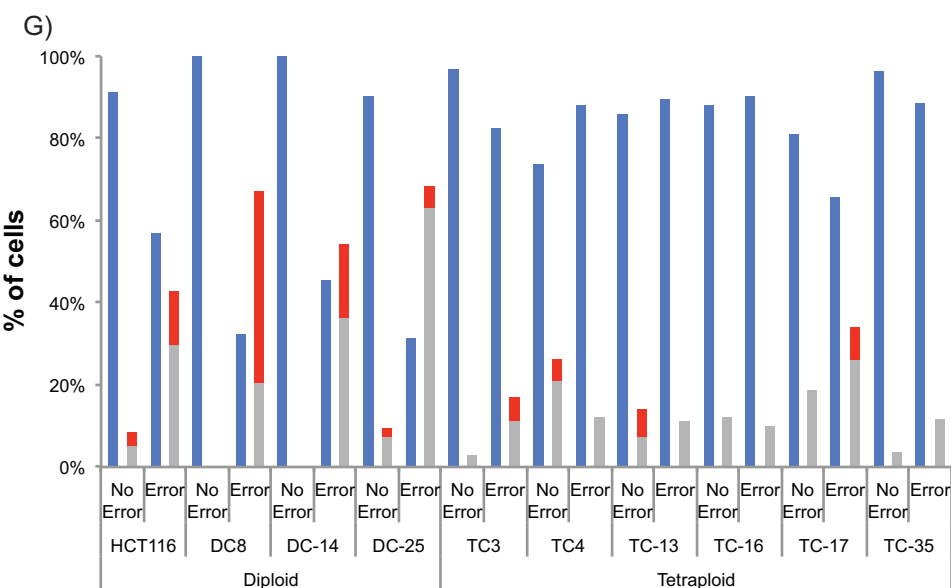

n numbers

| Summary | Error | No error | Total |
|---------|-------|----------|-------|
| HCT-116 | 37    | 78       | 115   |
| DC 8    | 34    | 29       | 63    |
| DC-14   | 11    | 45       | 56    |
| DC-25   | 19    | 41       | 60    |
| TC 3    | 62    | 33       | 95    |
| TC 4    | 25    | 38       | 63    |
| TC-13   | 28    | 28       | 56    |
| TC-16   | 31    | 25       | 56    |
| TC-17   | 38    | 48       | 86    |
| TC-35   | 26    | 28       | 54    |

## Supplementary Figure 4

(A-F) Screen shots captured from Supplementary movies A-C to highlight cell fate either after a segregation error (A-C) or no segregation error (D-F). Time is shown below (hh:mm). **G**) Individual cell fate graph showing different cell fates between diploids and tetraploids after a segregation error. N numbers of daughter cells are shown in the table. Data presented is an amalgamation of different passage numbers: passage 6, 14 and 56 – three experiments for DC 8, TC 3 and TC4, passage 10 and 20 - two experiments for DC-14, DC-25, TC-13, TC-16, and TC-35. TC-17: 3 experiments (p10, p12, p20). HCT-116, three experiments.
