# Supplementary material
Source: PubMed Central journal article supplement (PMC4293454)
Supplement: NIHMS55992-supplement-7.pdf [file NIHMS55992-supplement-7.pdf]

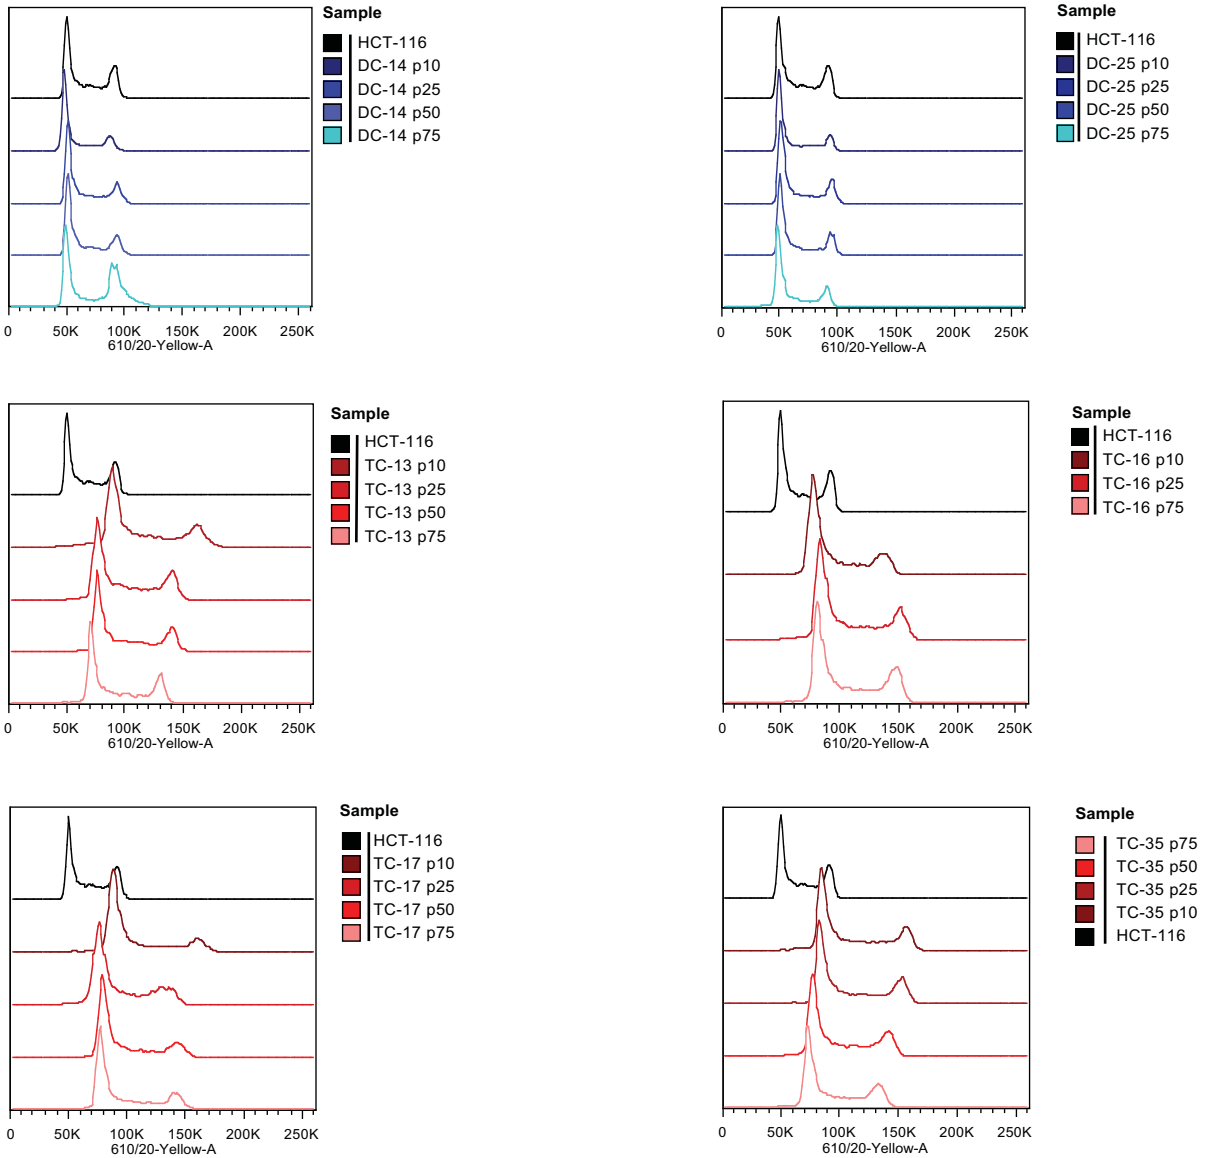

### Supplementary Figure 5

Flow cytometry data from all second generation diploid and tetraploid clones from indicated passage numbers (passage 10 to passage 75). All clones were prepared at the same cell number to Propidium Iodide concentration.
