# Supplementary material
Source: PubMed Central journal article supplement (PMC4293454)
Supplement: NIHMS55992-supplement-8.pdf [file NIHMS55992-supplement-8.pdf]

A)

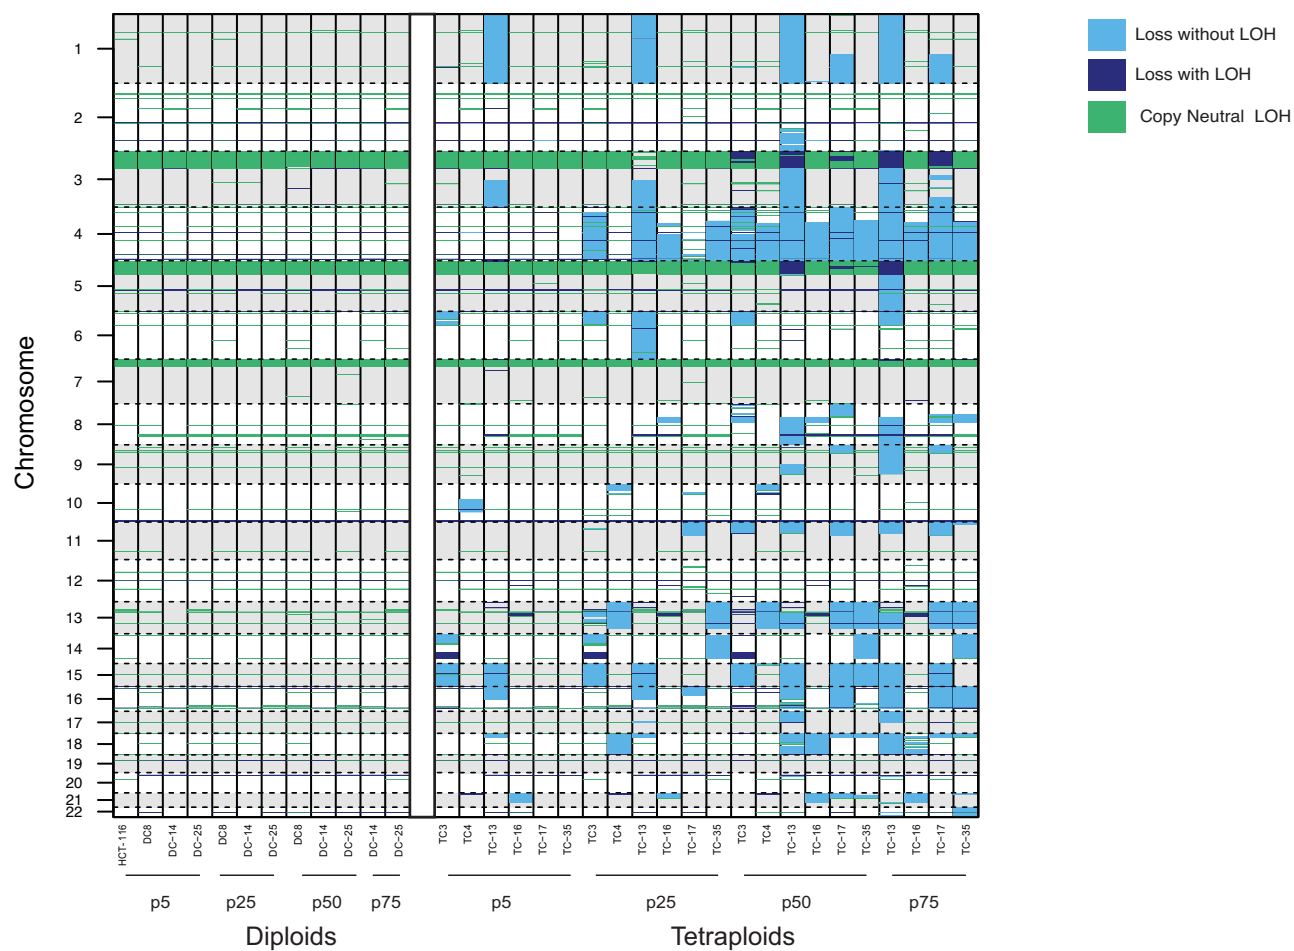

B)

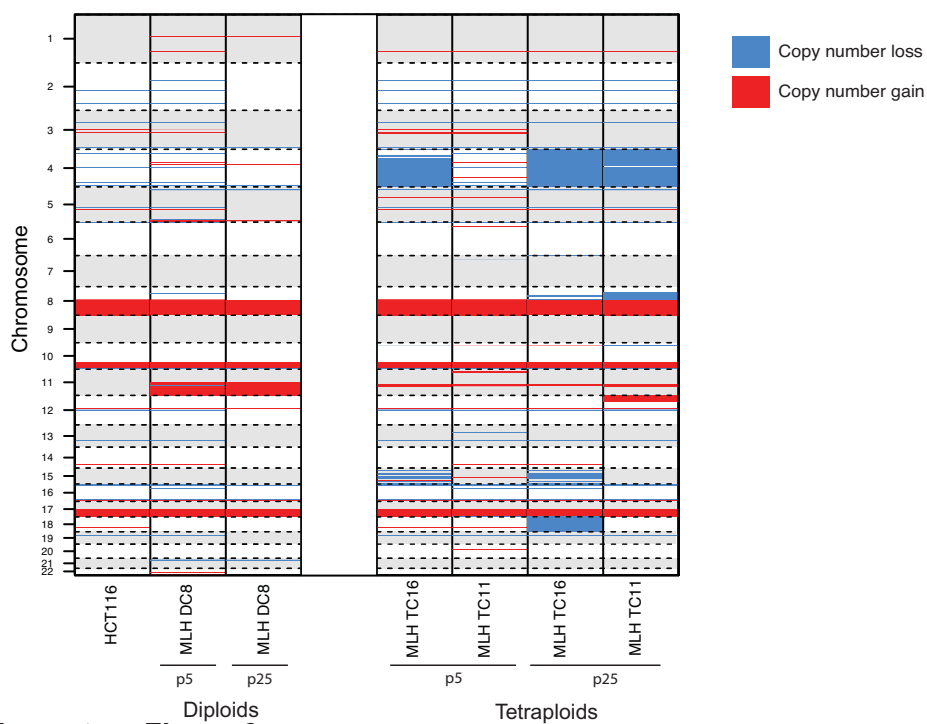

**Supplementary Figure 6**

A) Copy number losses and LOH in all diploid and tetraploid passages determined from SNP6.0 data. Losses are relative to median ploidy (see Methods).

B) Copy number losses and gains for one MLH1 diploid and two tetraploid clones compared to parental HCT-116. Clone and passage number is shown on x-axis. Y-axis shows chromosomal position. Blue represents loss and red represents gain relative to ploidy (see Methods).
