# Supplementary material
Source: PubMed Central journal article supplement (PMC4293454)
Supplement: NIHMS55992-supplement-9.pdf [file NIHMS55992-supplement-9.pdf]

## TCGA Colon: wGII vs. cytoband

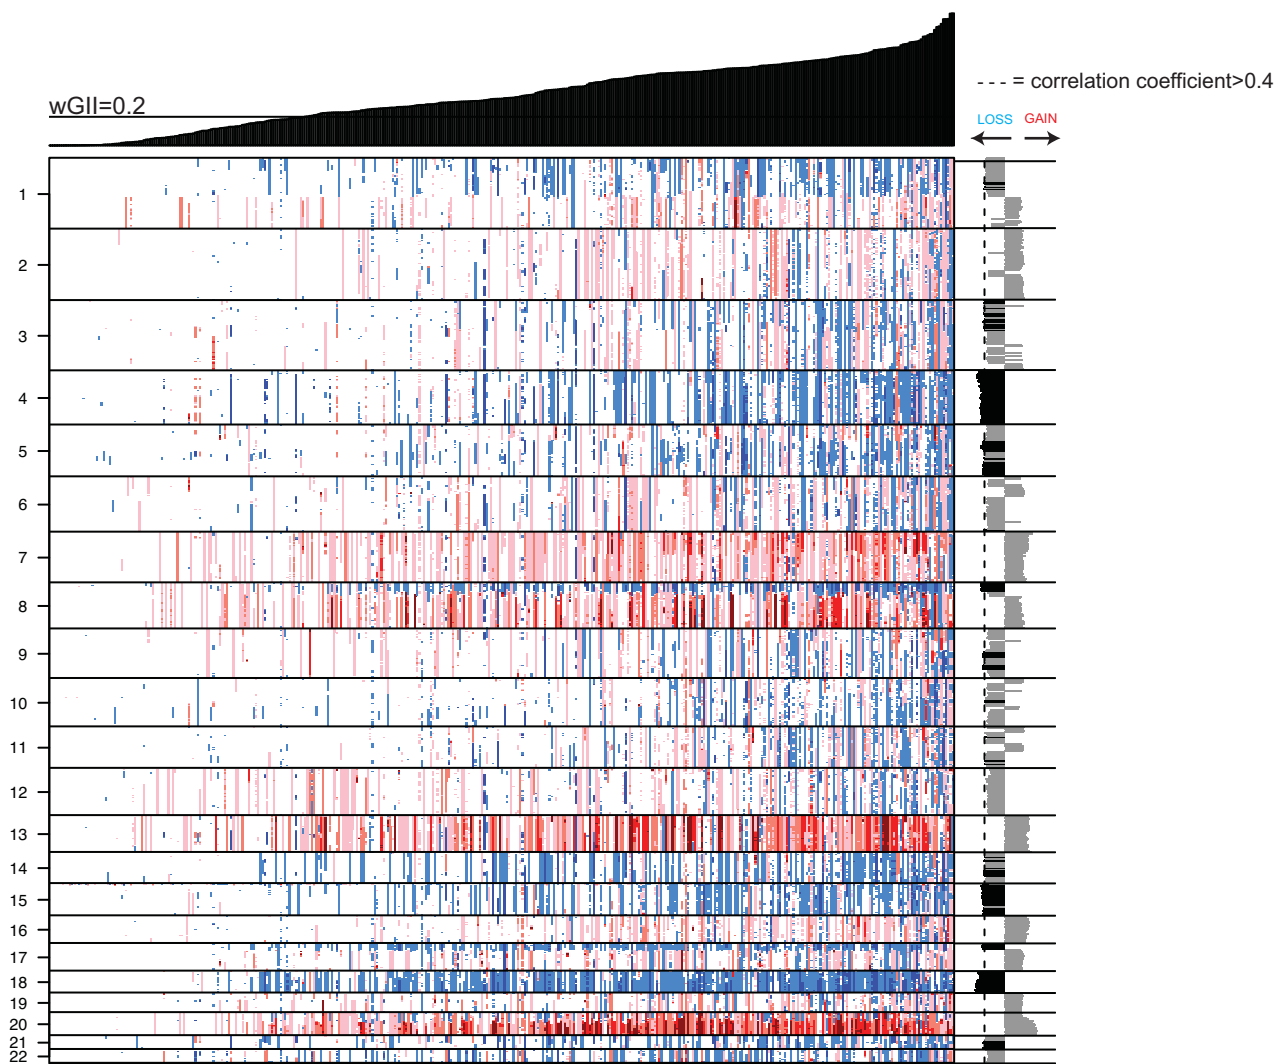**Supplementary Figure 7**

Correlation of copy number loss with wGII for TCGA samples. Copy number losses (blue) and gains (red) are relative to median ploidy. Genome is depicted at cytoband resolution. Spearman's rank correlation between copy number state and wGII is shown on right.
