# Supplementary material
Source: PubMed Central journal article supplement (PMC4293454)
Supplement: NIHMS55992-supplement-10.pdf [file NIHMS55992-supplement-10.pdf]

A)

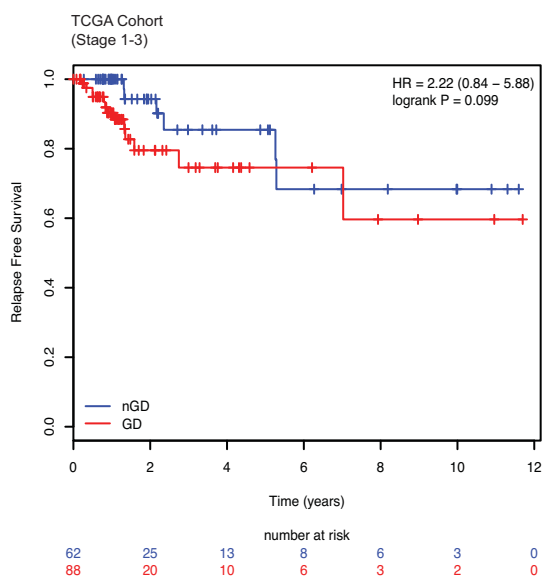

B)

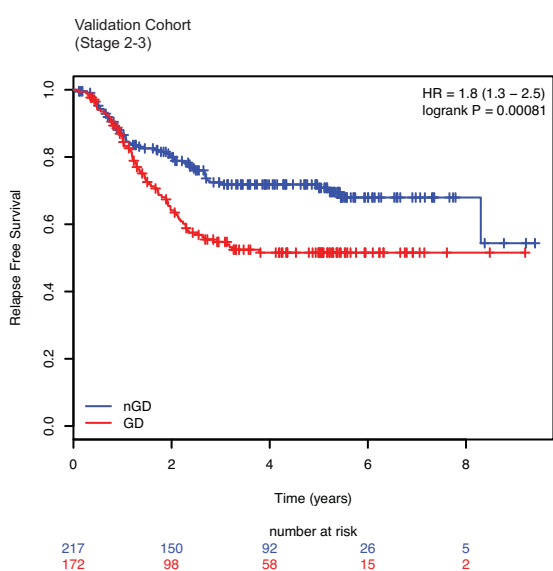

C)

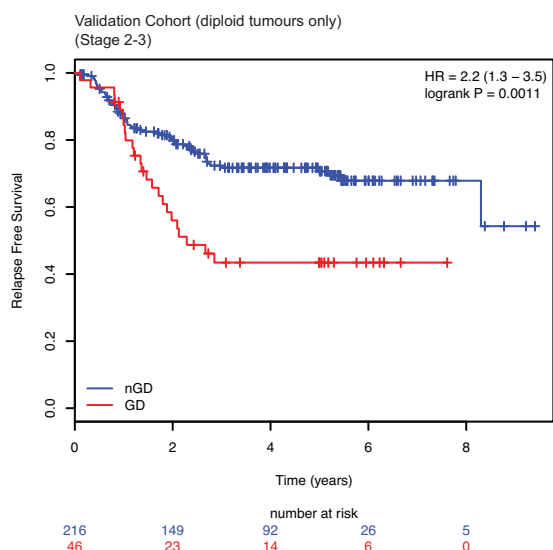

### Supplementary Figure 8

**A)** Full Kaplan Meier relapse free survival curves for genome-doubled (GD; red) and non-genome doubled (nGD; blue) TCGA cohort CRC tumours (n=150).  $P=0.099$ , log-rank test.

**B)** Full Kaplan Meier relapse-free survival curves for genome-doubled (GD; red) and non-genome doubled (nGD; blue) validation cohort CRC tumours (n=389).  $P=0.00081$ , log-rank test.

**C)** Full Kaplan Meier relapse-free survival curves for genome-doubled (GD; red) and non-genome doubled (nGD; blue) diploid validation cohort CRC tumours (n=262).  $P=0.0011$ , log-rank test.
